# Supplementary material
Source: PubMed Central journal article supplement (PMC5461577)
Supplement: NIHMS847832-supplement-SI_Table_1.pdf [file NIHMS847832-supplement-SI_Table_1.pdf]

**Table S1. Mercury ( $\mu\text{g}/\text{kg}$  wet mass) in Pacific Ocean Seabird Eggs with Acknowledgments**

|                                     | <b>N</b>  | <b>Geomean</b> | <b>Range</b>     | <b>Method</b> | <b>Collector</b>                                                                                           | <b>Processor</b>                                                          | <b>Analyst</b>             | <b>Reference</b> |
|-------------------------------------|-----------|----------------|------------------|---------------|------------------------------------------------------------------------------------------------------------|---------------------------------------------------------------------------|----------------------------|------------------|
| <b>Hawaiian Islands</b>             |           |                |                  |               |                                                                                                            |                                                                           |                            |                  |
| <b>Kaena Point, Oahu Overall</b>    |           |                |                  |               |                                                                                                            |                                                                           |                            |                  |
| Phoebastria immutabilis 2010        | 11        | 405            | 247 - 729        | DMA-80        | Lindsay Young                                                                                              | Angela Hansen, Frannie Nilsen, Stacy Vander Pol                           | Colleen Bryan              | This study       |
| Phoebastria immutabilis 2011        | 7         | 266            | 190 - 349        | DMA-80        | Lindsay Young                                                                                              | Melannie Bachman, Angela, Hansen, Frannie Nilsen, Rebecca Pugh            | Colleen Bryan              | This study       |
| Phoebastria immutabilis 2012        | 15        | 299            | 133 - 486        | DMA-80        | Lindsay Young                                                                                              | Angela Hansen, Frannie Nilsen, Rebecca Pugh                               | Colleen Bryan, Julia Smith | This study       |
| Phoebastria immutabilis 2013        | 17        | 371            | 158 - 826        | DMA-80        | Lindsay Young                                                                                              | Jessica Jacob, Julia Smith, Rebecca Pugh                                  | Colleen Bryan, Julia Smith | This study       |
| <b>Barking Sands, Kauai Overall</b> |           |                |                  |               |                                                                                                            |                                                                           |                            |                  |
| Phoebastria immutabilis 2010        | 12        | 387            | 221 - 808        | DMA-80        | Peter Silva                                                                                                | Angela Hansen, Frannie Nilsen, Stacy Vander Pol                           | Colleen Bryan              | This study       |
| Phoebastria immutabilis 2011        | 19        | 313            | 155 - 712        | DMA-80        | Jason Shimauchi, Peter Silva                                                                               | Melannie Bachman, Angela, Hansen, Frannie Nilsen, Rebecca Pugh            | Colleen Bryan              | This study       |
| Phoebastria immutabilis 2012        | 13        | 323            | 152 - 486        | DMA-80        | Jason Shimauchi, Peter Silva                                                                               | Angela Hansen, Frannie Nilsen, Rebecca Pugh                               | Colleen Bryan, Julia Smith | This study       |
| Phoebastria immutabilis 2013        | 15        | 315            | 205 - 605        | DMA-80        | Jason Shimauchi                                                                                            | Jessica Jacob, Julia Smith, Rebecca Pugh                                  | Colleen Bryan, Julia Smith | This study       |
| <b>North Shore, Kauai Overall</b>   |           |                |                  |               |                                                                                                            |                                                                           |                            |                  |
| Phoebastria immutabilis 2010        | 20        | 334            | 155 - 535        | DMA-80        | Lindsay Young, Eric Vander Werf, Kim Uyehara, Megan Dalton, Marilou Knight, Aaron Hebshi, Stacy Vander Pol | Angela Hansen, Frannie Nilsen, Stacy Vander Pol                           | Colleen Bryan              | This study       |
| Phoebastria immutabilis 2011        | 16        | 351            | 150 - 758        | DMA-80        | Justin Fujimoto                                                                                            | Melannie Bachman, Angela, Hansen, Frannie Nilsen, Rebecca Pugh            | Colleen Bryan              | This study       |
| Phoebastria immutabilis 2012        | 15        | 344            | 143 - 1020       | DMA-80        | Lindsay Young, Eric Vander Werf                                                                            | Angela Hansen, Frannie Nilsen, Rebecca Pugh                               | Colleen Bryan, Julia Smith | This study       |
| Phoebastria immutabilis 2013        | 4         | 480            | 334 - 795        | DMA-80        | Julie Murphy, Angie Serota, Lindsay Young                                                                  | Jessica Jacob, Julia Smith, Rebecca Pugh                                  | Colleen Bryan, Julia Smith | This study       |
| <b>Midway Atoll Overall</b>         |           |                |                  |               |                                                                                                            |                                                                           |                            |                  |
| Phoebastria immutabilis 2011        | 22        | 204            | 127 - 511        | DMA-80        | Nick Aspey, Debra Cofel, Karen Guglielmone, Ann Humphrey, Dagmar Leary                                     | Melannie Bachman, Angela, Hansen, Frannie Nilsen, Rebecca Pugh            | Colleen Bryan              | This study       |
| Phoebastria immutabilis 2012        | 5         | 247            | 223 - 260        | DMA-80        | Dagmar Leary, Pete Leary                                                                                   | Angela Hansen, Jessica Jacob, Rebecca Pugh                                | Colleen Bryan, Julia Smith | This study       |
| Phoebastria immutabilis 2013        | 13        | 263            | 178 - 482        | DMA-80        | Nicole Cody, Ann Humphrey, Hope Ronco                                                                      | Jessica Jacob, Julia Smith, Angela Hansen, Katherine Clukey, Rebecca Pugh | Colleen Bryan, Julia Smith | This study       |
| Phoebastria nigripes 2011           | 2         | 1140           | 639 - 2020       | DMA-80        | Nick Aspey, Ann Humphrey, Dagmar Leary                                                                     | Melannie Bachman, Angela, Hansen, Frannie Nilsen, Rebecca Pugh            | Colleen Bryan              | This study       |
| Phoebastria nigripes 2012           | 7         | 1420           | 662 - 2960       | DMA-80        | Dagmar Leary, Pete Leary, Greg Schubert, Bob Schulmeister                                                  | Angela Hansen, Jessica Jacob, Rebecca Pugh                                | Colleen Bryan, Julia Smith | This study       |
| Phoebastria nigripes 2013           | 7         | 1010           | 657 - 1430       | DMA-80        | Nicole Cody, Ann Humphrey, Hope Ronco                                                                      | Jessica Jacob, Julia Smith, Angela Hansen, Katherine Clukey, Rebecca Pugh | Colleen Bryan, Julia Smith | This study       |
| <b>Gulf of Alaska</b>               |           |                |                  |               |                                                                                                            |                                                                           |                            |                  |
| <b>St. Lazaria I. Overall</b>       |           |                |                  |               |                                                                                                            |                                                                           |                            |                  |
|                                     | <b>89</b> | <b>156</b>     | <b>22.9 -376</b> |               |                                                                                                            |                                                                           |                            |                  |

|                                |           |             |                   |             |                              |                                                |               |                                  |  |
|--------------------------------|-----------|-------------|-------------------|-------------|------------------------------|------------------------------------------------|---------------|----------------------------------|--|
| Uria aalge 1999                | 10        | 199         | 118 - 277         | ID-CV-ICPMS | Alexis Paul and Susan Hatch  | Geoff York, Barb Porter                        | Rusty Day     | doi:10.1021/es051064i            |  |
| Uria aalge 2001                | 10        | 145         | 68.6 - 198        | ID-CV-ICPMS | Leslie Slater                | Rebecca Pugh                                   | Rusty Day     | doi:10.1021/es051064i            |  |
| Uria aalge 2003                | 10        | 169         | 107 - 227         | ID-CV-ICPMS | Leslie Slater                | Lesley Chappel, Kristin Simac, Michael Ellisor | Rusty Day     | doi:10.1016/j.envpol.2012.03.004 |  |
| Uria aalge 2004                | 8         | 205         | 132 - 376         | ID-CV-ICPMS | Leslie Slater                | Kristin Simac, Michael Ellisor                 | Rusty Day     | doi:10.1016/j.envpol.2012.03.004 |  |
| Uria aalge 2006                | 5         | 119         | 69.4 - 229        | DMA-80      | Leslie Slater                | Lesley Bunch, Kristin Simac, Amanda Moors      | Colleen Bryan | This study                       |  |
| Uria aalge 2008                | 5         | 173         | 113 - 236         | ID-CV-ICPMS | Leslie Slater                | Karen Corbell, Rebecca Pugh                    | Rusty Day     | doi:10.1021/es2047156            |  |
| Uria aalge 2010                | 5         | 142         | 22.9 - 325        | DMA-80      | Leslie Slater                | David Roseneau, Rebecca Pugh                   | Colleen Bryan | This study                       |  |
| Uria lomvia 2001               | 10        | 97          | 48.4 - 176        | ID-CV-ICPMS | Leslie Slater                | Rebecca Pugh                                   | Rusty Day     | doi:10.1016/j.envpol.2012.03.004 |  |
| Uria lomvia 2002               | 6         | 196         | 151 - 239         | ID-CV-ICPMS | Leslie Slater                | Lesley Chappel, Kristin Simac, Rebecca Pugh    | Rusty Day     | doi:10.1016/j.envpol.2012.03.005 |  |
| Uria lomvia 2004               | 5         | 200         | 158 - 232         | DMA-80      | Leslie Slater                | Kristin Simac, Michael Ellisor                 | Colleen Bryan | This study                       |  |
| Uria lomvia 2006               | 5         | 116         | 65 - 305          | DMA-80      | Leslie Slater                | Lesley Bunch, Kristin Simac, Amanda Moors      | Colleen Bryan | This study                       |  |
| Uria lomvia 2008               | 5         | 139         | 76 - 190          | ID-CV-ICPMS | Leslie Slater                | Karen Corbell, Rebecca Pugh                    | Rusty Day     | doi:10.1021/es2047156            |  |
| Uria lomvia 2010               | 5         | 175         | 72.4 - 274        | DMA-80      | Leslie Slater                | David Roseneau, Rebecca Pugh                   | Colleen Bryan | This study                       |  |
| <b>Middleton I. Overall</b>    | <b>18</b> | <b>178</b>  | <b>95.4 - 239</b> |             |                              |                                                |               |                                  |  |
| Uria aalge 2003                | 10        | 151         | 95.4 - 239        | ID-CV-ICPMS | Andrew Ramey                 | Lesley Chappel, Kristin Simac, Michael Ellisor | Rusty Day     | doi:10.1016/j.envpol.2012.03.005 |  |
| Uria aalge 2004                | 8         | 220         | 118 - 350         | ID-CV-ICPMS | Jessica Fisher               | Kristin Simac, Michael Ellisor                 | Rusty Day     | doi:10.1016/j.envpol.2012.03.005 |  |
| <b>East Amatuli I. Overall</b> | <b>21</b> | <b>147</b>  | <b>90 - 357</b>   |             |                              |                                                |               |                                  |  |
| Uria aalge 1999                | 11        | 187         | 90 - 357          | ID-CV-ICPMS | Arthur Kettle                | Kristin Simac, Rebecca Pugh                    | Rusty Day     | doi:10.1021/es051064i            |  |
| Uria aalge 2003                | 10        | 113         | 91.7 - 140        | ID-CV-ICPMS | Arthur Kettle                | Kristin Simac, Michael Ellisor                 | Rusty Day     | doi:10.1016/j.envpol.2012.03.005 |  |
| <b>Gull I. Uria aalge 2004</b> | <b>8</b>  | <b>128</b>  | <b>92.8 - 187</b> | ID-CV-ICPMS | Nick Tanape                  | Kristin Simac, Michael Ellisor                 | Rusty Day     | doi:10.1016/j.envpol.2012.03.005 |  |
| <b>Duck I. Uria aalge 2004</b> | <b>4</b>  | <b>174</b>  | <b>145 - 221</b>  | ID-CV-ICPMS | Leslie Slater                | Kristin Simac, Michael Ellisor                 | Rusty Day     | doi:10.1016/j.envpol.2012.03.005 |  |
| <b>Aleutian Islands</b>        |           |             |                   |             |                              |                                                |               |                                  |  |
| <b>Bogoslof I. Overall</b>     | <b>24</b> | <b>46.4</b> | <b>12.8 - 139</b> |             |                              |                                                |               |                                  |  |
| Uria aalge 2000                | 9         | 27.4        | 12.8 - 47.9       | ID-CV-ICPMS | G. Vernon Byrd               | Kristin Simac, Rebecca Pugh                    | Rusty Day     | doi:10.1021/es051064i            |  |
| Uria lomvia 2000               | 10        | 78.6        | 24 - 114          | ID-CV-ICPMS | G. Vernon Byrd               | Kristin Simac, Rebecca Pugh                    | Rusty Day     | doi:10.1021/es051064i            |  |
| Uria aalge 2005                | 5         | 41.7        | 15.9 - 139        | ID-CV-ICPMS | Jeff Williams                | Lesley Chappel, Kristin Simac, Amanda Moors    | Rusty Day     | doi:10.1016/j.envpol.2012.03.005 |  |
| <b>Buldir I. Overall</b>       | <b>15</b> | <b>242</b>  | <b>188 - 367</b>  |             |                              |                                                |               |                                  |  |
| Uria lomvia 2004               | 5         | 221         | 188 - 275         | DMA-80      | Slade F. Sapora              | Kristin Simac, Michael Ellisor                 | Colleen Bryan | This study                       |  |
| Uria lomvia 2006               | 5         | 268         | 195 - 367         | DMA-80      | Leslie Slater, Rachael Orben | Lesley Bunch, Kristin Simac, Amanda Moors      | Colleen Bryan | This study                       |  |

|                                    |           |             |                    |             |                                |                                                |               |                                  |
|------------------------------------|-----------|-------------|--------------------|-------------|--------------------------------|------------------------------------------------|---------------|----------------------------------|
| Uria lomvia 2010                   | 5         | 240         | 205 - 299          | DMA-80      | Alexis Will                    | David Roseneau, Rebecca Pugh                   | Colleen Bryan | This study                       |
| <b>Bering Sea</b>                  |           |             |                    |             |                                |                                                |               |                                  |
| <b>St. George I. Overall</b>       | <b>60</b> | <b>27.8</b> | <b>7 - 192</b>     |             |                                |                                                |               |                                  |
| Uria aalge 1999                    | 11        | 24.3        | 13.4 - 41          | ID-CV-ICPMS | Dean Kildaw                    | Geoff York, Barb Porter                        | Rusty Day     | doi:10.1021/es051064i            |
| Uria lomvia 2000                   | 7         | 36.8        | 31.2 - 48.5        | ID-CV-ICPMS | Laurie Ness                    | Paul Becker, Stacy Vander Pol, Rebecca Pugh    | Rusty Day     | doi:10.1021/es051064i            |
| Uria lomvia 2002                   | 7         | 36.3        | 14.2 - 82.4        | ID-CV-ICPMS | Julie Snorek                   | Lesley Chappel, Kristin Simac, Rebecca Pugh    | Rusty Day     | doi:10.1016/j.envpol.2012.03.005 |
| Uria aalge 2004                    | 5         | 33          | 23.4 - 44.3        | DMA-80      | Andrew Malavansky              | Kristin Simac, Michael Ellisor                 | Colleen Bryan | This study                       |
| Uria lomvia 2005                   | 5         | 45.5        | 26.2 - 64.3        | DMA-80      | Andy Malavansky                | Lesley Chappel, Kristin Simac, Amanda Moors    | Colleen Bryan | This study                       |
| Uria aalge 2006                    | 5         | 18.4        | 9.96 - 35.1        | DMA-80      | Andy Malavansky                | Lesley Bunch, Kristin Simac, Amanda Moors      | Colleen Bryan | This study                       |
| Uria lomvia 2008                   | 5         | 81.5        | 55 - 192           | ID-CV-ICPMS | Gary Merculief                 | Karen Corbell, Rebecca Pugh                    | Rusty Day     | doi:10.1021/es2047156            |
| Uria aalge 2009                    | 5         | 8.91        | 7 - 10             | ID-CV-ICPMS | Peter and Nick Lekanof         | David Roseneau, Rebecca Pugh                   | Rusty Day     | doi:10.1021/es2047156            |
| Uria aalge 2010                    | 5         | 23.1        | 15.6 - 28.5        | DMA-80      | Gary Merculief, Rex Iyanninguk | David Roseneau, Rebecca Pugh                   | Colleen Bryan | This study                       |
| Uria lomvia 2010                   | 5         | 17.6        | 9.89 - 27.9        | DMA-80      | Gary Merculief, Rex Iyanninguk | David Roseneau, Rebecca Pugh                   | Colleen Bryan | This study                       |
| <b>St. Paul I. Overall</b>         |           |             |                    |             |                                |                                                |               |                                  |
| <b>St. Paul I. Overall</b>         | <b>15</b> | <b>29.1</b> | <b>6.24 - 84.8</b> |             |                                |                                                |               |                                  |
| Uria lomvia 2009                   | 5         | 16.5        | 9 - 44             | ID-CV-ICPMS | Greg Thomson, Mike McClintock  | David Roseneau, Rebecca Pugh                   | Rusty Day     | doi:10.1021/es2047156            |
| Uria aalge 2010                    | 5         | 33.4        | 6.24 - 62.6        | DMA-80      | Greg Thomson                   | David Roseneau, Rebecca Pugh                   | Colleen Bryan | This study                       |
| Uria lomvia 2010                   | 5         | 44.6        | 22.1 - 84.8        | DMA-80      | Greg Thomson                   | David Roseneau, Rebecca Pugh                   | Colleen Bryan | This study                       |
| <b>Cape Pierce Uria aalge 2005</b> |           |             |                    |             |                                |                                                |               |                                  |
| <b>Cape Pierce Uria aalge 2005</b> | <b>5</b>  | <b>47.4</b> | <b>28 - 112</b>    | ID-CV-ICPMS | Rob MacDonald                  | Lesley Chappel, Kristin Simac, Amanda Moors    | Rusty Day     | doi:10.1016/j.envpol.2012.03.005 |
| <b>St. Lawrence I. Overall</b>     |           |             |                    |             |                                |                                                |               |                                  |
| <b>St. Lawrence I. Overall</b>     | <b>34</b> | <b>41.2</b> | <b>12 - 138</b>    |             |                                |                                                |               |                                  |
| Uria aalge 2002                    | 3         | 28.7        | 19.1 - 53          | DMA-80      | Brandon Waghiyi/Adrian Gall    | Lesley Chappel, Kristin Simac, Rebecca Pugh    | Colleen Bryan | This study                       |
| Uria aalge 2006                    | 5         | 83.8        | 56 - 138           | DMA-80      | Brandon Waghiyi                | Lesley Bunch, Kristin Simac, Amanda Moors      | Colleen Bryan | This study                       |
| Uria aalge 2008                    | 5         | 50.6        | 36 - 69            | ID-CV-ICPMS | Dylan Iya                      | Karen Corbell, Rebecca Pugh                    | Rusty Day     | doi:10.1021/es2047156            |
| Uria lomvia 2002                   | 6         | 37.5        | 24.6 - 70.1        | ID-CV-ICPMS | Jackson Mokiyyuk/Adrian Gall   | Lesley Chappel, Kristin Simac, Rebecca Pugh    | Rusty Day     | doi:10.1016/j.envpol.2012.03.005 |
| Uria lomvia 2003                   | 5         | 17.6        | 13.1 - 25.6        | DMA-80      | Brandon Waghiyi                | Lesley Chappel, Kristin Simac, Michael Ellisor | Colleen Bryan | This study                       |
| Uria lomvia 2006                   | 5         | 79.7        | 58.2 - 120         | DMA-80      | Brandon Waghiyi                | Lesley Bunch, Kristin Simac, Amanda Moors      | Colleen Bryan | This study                       |
| Uria lomvia 2008                   | 5         | 27.9        | 12 - 41            | ID-CV-ICPMS | Dylan Iya                      | Karen Corbell, Rebecca Pugh                    | Rusty Day     | doi:10.1021/es2047156            |
| <b>Norton Sound</b>                |           |             |                    |             |                                |                                                |               |                                  |
| <b>Bluff Overall</b>               |           |             |                    |             |                                |                                                |               |                                  |
| <b>Bluff Overall</b>               | <b>15</b> | <b>124</b>  | <b>74.5 - 234</b>  |             |                                |                                                |               |                                  |
| Uria aalge 2002                    | 5         | 102         | 74.5 - 124         | DMA-80      | Ed Murphy                      | Lesley Chappel, Kristin Simac, Rebecca Pugh    | Colleen Bryan | This study                       |
| Uria aalge 2005                    | 5         | 155         | 101 - 234          | ID-CV-ICPMS | Roy Ashenfelter                | Lesley Chappel, Kristin Simac, Amanda Moors    | Rusty Day     | doi:10.1016/j.envpol.2012.03.005 |

|                                          |           |             |                    |             |                |                                             |           |                                  |
|------------------------------------------|-----------|-------------|--------------------|-------------|----------------|---------------------------------------------|-----------|----------------------------------|
| Uria aalge 2008                          | 5         | 121         | 82 - 144           | ID-CV-ICPMS | T. Sparks      | Karen Corbell, Rebecca Pugh                 | Rusty Day | doi:10.1021/es2047156            |
| <b>Sledge I. Overall</b>                 | <b>10</b> | <b>92</b>   | <b>52 - 172</b>    |             |                |                                             |           |                                  |
| Uria aalge 2005                          | 5         | 117         | 77.5 - 172         | ID-CV-ICPMS | Harold Ahmasuk | Lesley Chappel, Kristin Simac, Amanda Moors | Rusty Day | doi:10.1016/j.envpol.2012.03.005 |
| Uria aalge 2008                          | 5         | 72.5        | 52 - 102           | ID-CV-ICPMS | Austin Ahmasuk | Karen Corbell, Rebecca Pugh                 | Rusty Day | doi:10.1021/es2047156            |
| <b>Cape Denbigh Overall</b>              | <b>10</b> | <b>136</b>  | <b>84 - 287</b>    |             |                |                                             |           |                                  |
| Uria aalge 2005                          | 5         | 174         | 110 - 287          | ID-CV-ICPMS | Lance Sampson  | Lesley Chappel, Kristin Simac, Amanda Moors | Rusty Day | doi:10.1016/j.envpol.2012.03.005 |
| Uria aalge 2009                          | 5         | 106         | 84 - 184           | ID-CV-ICPMS | Clyde Jackson  | David Roseneau, Rebecca Pugh                | Rusty Day | doi:10.1021/es2047156            |
| <b>Bering Strait and Chukchi Sea</b>     |           |             |                    |             |                |                                             |           |                                  |
| <b>Little Diomed I. Uria lomvia 2008</b> | <b>5</b>  | <b>73.2</b> | <b>56 - 97</b>     | ID-CV-ICPMS | Dylan Iya      | Karen Corbell, Rebecca Pugh                 | Rusty Day | doi:10.1021/es2047156            |
| <b>Cape Lisburne Uria lomvia 2002</b>    | <b>6</b>  | <b>50.8</b> | <b>32.1 - 72.3</b> | ID-CV-ICPMS | Earl Kingik    | Lesley Chappel, Kristin Simac, Rebecca Pugh | Rusty Day | doi:10.1016/j.envpol.2012.03.005 |
